# Supplementary figures and images for: Tempo and Mode of Genome Structure Evolution in Insects
Source: MDPI journal article supplement (doi:10.3390/genes14020336), 2023-01-28

Figure S1. Sensitivity analysis of Lepidoptera

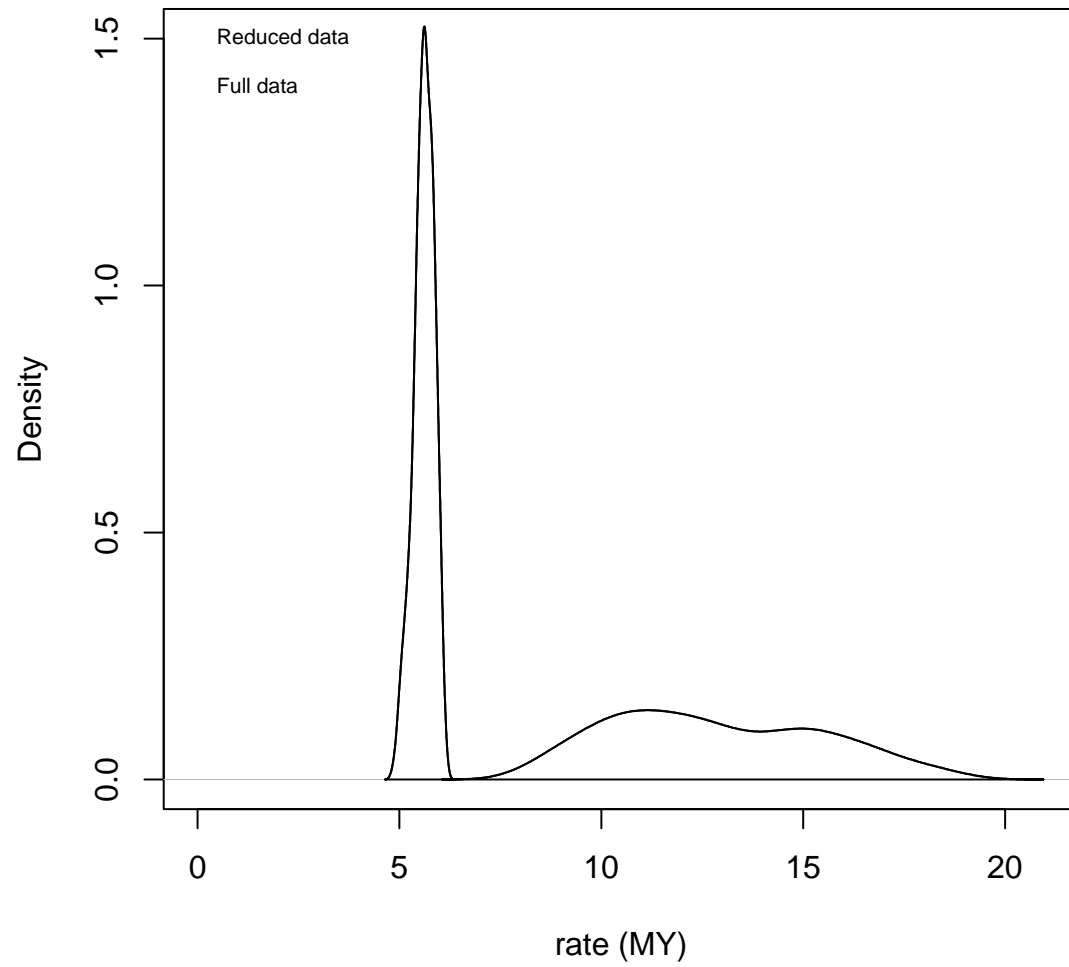

Figure S2. Sensitivity analysis of Coleoptera

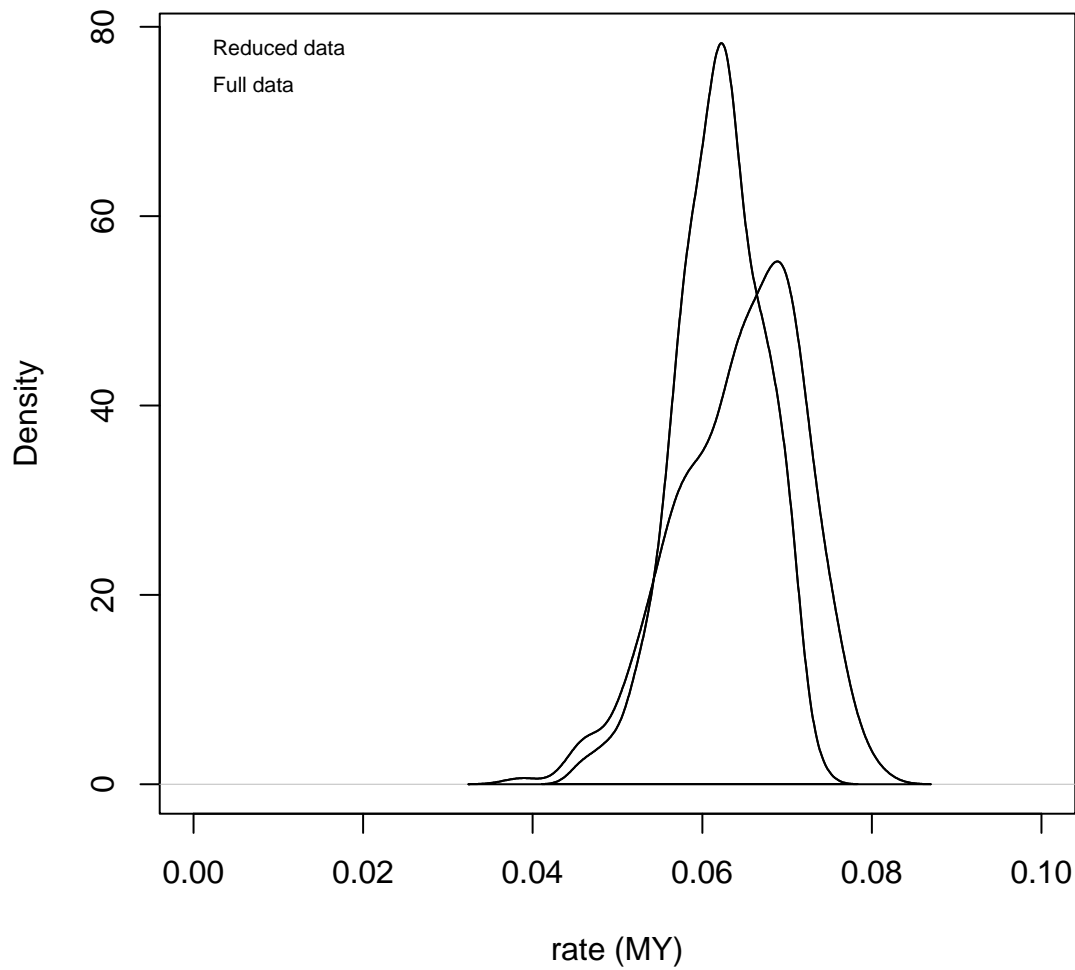

Supplement: s1 [file s1]
